# Supplementary material for: Polycystic Ovary Syndrome Susceptibility Loci Inform Disease Etiological Heterogeneity
Source: MDPI journal article supplement (doi:10.3390/jcm10122688), 2021-06-18
Supplement: s1 [file s1]

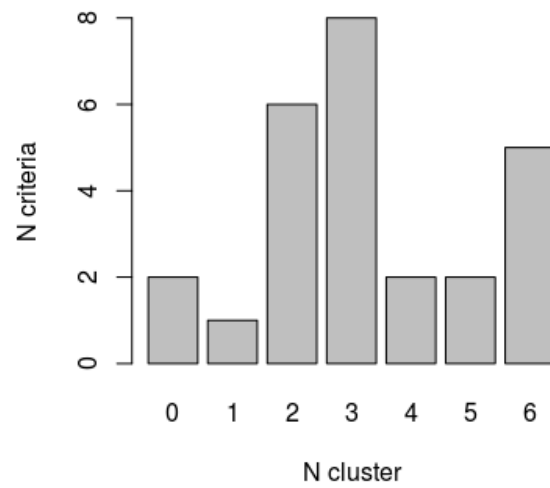

**Figure S1.** Using NbClust to identify the best number of clusters for k-means clustering. X-axis represents the number of clusters; y-axis represents of the number of criteria to support the number of clusters by NbClust package.
