# Supplementary material for: Polycystic Ovary Syndrome Susceptibility Loci Inform Disease Etiological Heterogeneity
Source: J Clin Med. 2021 Jun 18;10(12):2688. doi: 10.3390/jcm10122688 (PMC8234947; doi:10.3390/jcm10122688)
Supplement: Supplementary file 1 [file jcm-10-02688-s001.zip › Supplementary tables 1-4.xlsx]

## Sheet: Suppelementary table 1
Supplementary table 1. PCOS significant variants by GWAS
SNV	CHR:BP (GRCh37)	Risk allele	Other Allele	Cluster	Gene	Population	Comment	PMID
rs10986105	9:126549955	C	A	1	DENND1A	Han Chinese	Keep	21151128
rs10993397	9:97679771	T	C	3	C9orf3	European	Keep. Using proxy SNP rs7865239	26284813
rs11031005	11:30226356	C	T	2	ARL14EP/FSHB	European	Keep	30566500
rs11225154	11:102043240	A	G	3	YAP1	European	Keep	26416764; 30566500
rs12468394	2:43561161	C	A	2	THADA	Han Chinese	Keep	21151128
rs12478601	2:43721508	C	T	2	THADA	Han Chinese	Keep	21151128
rs1275468	12:75935157	C	T	2	KRR1	European	Keep	26416764
rs13164856	5:131813204	T	C	3	IRF1/RAD50	European	Keep	26416764; 30566500
rs13405728	2:48978159	A	G	2	LHCGR	Han Chinese	Keep	21151128
rs13429458	2:43638838	A	C	3	THADA	Han Chinese	Keep	21151128
rs17186366	6:159898261	C	T	3	SOD2	Mixed	Keep	32289280
rs1784692	11:113949232	A	G	3	ZBTB16	European	Keep	30566500
rs2059807	19:7166109	G	A	3	INSR	Han Chinese	Keep	22885925
rs2178575	2:213391766	A	G	3	ERBB4	European	Keep	30566500
rs2268361	2:49201612	C	T	1	FSHR	Han Chinese	Keep	22885925
rs2271194	12:56477694	T	A	2	ERBB3/RAB5B	European	Keep	30566500
rs2272046	12:66224461	A	C	2	HMGA2	Han Chinese	Keep	22885925
rs2349415	2:49247832	T	C	2	FSHR	Han Chinese	Keep	22885925
rs2479106	9:126525212	G	A	1	DENND1A	Han Chinese	Keep	21151128
rs3802457	9:97741336	G	A	3	C9orf3	Han Chinese	Keep	22885925
rs4784165	16:52347819	G	T	3	TOX3	Han Chinese	Keep	22885925
rs6022786	20:52447303	A	G	3	SUMO1P1	Han Chinese	Keep	22885925
rs705702	12:56390636	G	A	3	RAB5B,SUOX	Han Chinese	Keep	22885925
rs804279	8:11623889	T	A	2	GATA4 /NEIL2	European	Keep	26284813; 30566500
rs8043701	16:52375777	T	A	2	TOX3	European	Keep. Using proxy SNP rs11075468	30566500
rs9696009	9:126619233	A	G	1	DENND1A	European	Keep	30566500
rs10739076	9:5440589	A	C	/	PLGRKT	European	Removed because no results in most traits	30566500
rs113168128	2:212291772	A	G	/	ERBB4	Mixed	Removed because no results in most traits	32289280
rs7563201	2:43561780	A	G	/	THADA	European	Removed because no results in most traits	26416764; 30566500
rs853854	20:31420757	A	T	/	MAPRE1	European	Removed because no results in most traits	30566500
rs7864171	9:97723266	G	A	/	FANCC	European	Removed, 1) no results in most traits ;2) in LD with rs10993397 R2=0.96, D'=0.98	30566500
rs10818854	9:126446778	A	G	/	DENND1A	Han Chinese	Removed, in LD with rs10986105, R2=0.8, D'=1	21151128
rs4385527	9:97648587	G	A	/	C9orf3	Han Chinese	Removed, in LD with rs10993397, R2=0.96, D'=0.98	22885925
rs11031006	11:30226528	A	G	/	FSHB/KCNA4	European	Removed, in LD with rs11031006, R2=1, D'=1	26416764; 26284813
rs1894116	11:102070639	G	A	/	YAP1	Han Chinese	Removed, in LD with rs11225154, R2=0.93, D'=1	22885925
rs1795379	12:75941042	C	T	/	KRR1	European	Removed, in LD with rs1275468, R2=0.97, D'=1	30566500
rs1351592	2:213394712	G	C	/	ERBB4	European	Removed, in LD with rs2178575, R2=0.9, D'=0.9999	26416764

## Sheet: Supplementary table 2
Supplementary table 2. List of GWAS datasets of PCOS-related traits and disease outcomes.
Trait	Dataset ID	Sample size	Ancestry	PMID
Fasting Insulin with adj. BMI	ebi-a-GCST005217	4409	European	24699409
Fasting Insulin without adj. BMI	ebi-a-GCST005185	51750	European	22581228
Fasting glucose	ebi-a-GCST005186	58074	European	22581228
HOMA_IR, age, sex adjusted	ebi-a-GCST005179	37037	European	20081858
BMI-female	ieu-a-974	171977	European	25673413
WC-female	ieu-a-62	134593	Mixed	25673412
WC-female, BMI adjusted	ieu-a-68	134038	Mixed	25673412
WHR-female	ieu-a-74	124591	Mixed	25673412
WHR-female, BMI adjusted	ieu-a-80	123302	Mixed	25673412
TG	ieu-a-302	177861	Mixed	24097068
HDL	ieu-a-299	187167	Mixed	24097069
TC	ieu-a-301	187365	Mixed	24097070
LDL	ieu-a-300	173082	Mixed	24097071
SHBG	ukb-d-30830_raw	312215	European	/
LH	prot-a-529	3301	European	29875488
FSH	prot-c-3032_11_2	996	European	28240269
Outcome	dataset id	N	Ancestry	PMID
CAD	ebi-a-GCST005195	122733 case, 424528 control	/	29212778
T2DM	ebi-a-GCST006867	61714 case, 593952 control	European	30054458
Breast cancer	ieu-a-1126	122977 case, 105974 control	European	29059683
ER+ breast cancer	ieu-a-1127	69501 case	European	29059683
ER- breast cancer	ieu-a-1128	21468 case	European	29059683
Ovary cancer	ukb-b-18157	1087 case,	European	/
		461923 control
Endometrial cancer	ukb-b-13545	1151 case,	European	/
		461782 control
WC: waist circumference; WHR: waist-hip ratio; ER: estrogen receptor; T2DM: type 2 diabetes mellitus; CAD: coronary artery disease; SHBG: sex hormone binding globulin; BMI: body mass index; LH: luteinizing hormone; HOMA-IR: homeostatic model assessment of insulin resistance; FI: fasting insulin; FG: fasting glucose; HDL: high-density lipoprotein; LDL; low-density lipoprotein; TG: triglyceride; TC…

## Sheet: Supplementary table 3
Supplementary Table 3. Z score for 26 PCOS SNVs-quantitative traits associations
Gene	SNV	SHBG	LH	TG	TC	HDL	LDL	FI	FG	HOMA_IR	FI_BMIadj	FG_BMIadj	BMI_female	WC_female	WC_female_BMIadj	WHR_female	WHR_female_BMIadj
DENND1A	rs10986105	-2.87742	-0.493599	-0.967213	-0.112782	0.0634921	0.235294	1.29333	1.44737	1.47368	0.876923	1.53846	1.4065	1.5	1.53846	0.857143	0.928571
C9orf3	rs10993397	-1.32374	-0.772	1.26531	-0.264151	-0.32	-0.259259	-1.8125	-0.0625	-0.97561	-1.82143	0.121212	0.591837	0.740741	0.75	-0.490566	-0.962963
FSHB/ARL14EP	rs11031005	-2.57586	1.79202	-2.80882	-0.283784	2.08696	-0.789474	0.295455	0.136364	-0.236364	0.710526	-0.244444	0.19403	-0.118421	-0.453333	-2.26667	-2.66667
YAP1	rs11225154	1.99992	-1.34672	1.49412	1.16129	0.37931	0.831579	-0.133333	0.140351	0.356164	1.13725	1.06897	-1.28736	0.479592	1.66667	1.25	1.95876
THADA	rs12468394	0.9381	-0.870445	-1.47059	-4.16216	0.428571	-4.39474	2.5625	1.06452	2.39024	2.46429	0.212121	0.585366	0.651163	-0.186047	0.909091	0.266667
THADA	rs12478601	0.768332	-0.904762	-1.12766	-1.09615	0.583333	-1.01887	0.8125	3.87097	0.780488	0.703704	3.03125	0.0425532	-0.54717	-0.692308	-0.615385	-0.509434
KRR1	rs1275468	-0.860806	-1.00336	-1.53704	-0.448276	0.654545	0.254237	2.28571	0.114286	2.44444	1.33333	-0.388889	0.259259	0.819672	1.06667	0.666667	0.933333
IRF1/RAD50	rs13164856	1.10766	-0.172535	-0.660377	-0.724138	0.163636	-0.847458	-1	-0.485714	-1.06522	-1.06452	-0.75	-0.698113	-0.672131	1.20339	0.283333	1.06667
LHCGR	rs13405728	-2.7178	0.151667	0.320388	-0.339286	-0.775701	-0.403509	0.779661	0.564516	0.397436	1.15686	0.84127	-2.32353	-2.09091	-0.218182	-0.445455	0.427273
THADA	rs13429458	1.68884	-0.690955	-2.88679	-2.71429	0.981481	-2.43103	0.615385	0.423077	0.647059	0.363636	0.230769	0.078125	1.17647	1.47059	0.710145	0.0714286
SOD2	rs17186366	0.640536	0.531964	-0.567901	-1.55056	0.0963855	-1.47253	-0.574074	-2.64151	-0.0289855	-0.369565	-2.96296	1.04938	0.521739	0.404494	0.855556	0.945055
ZBTB16	rs1784692	-0.0958256	-0.314642	-1.45312	-1.61765	1.40625	-1.78571	-1.43182	0.309524	-0.75	-0.756757	0.209302	0.753846	0.356164	-0.569444	1	0.819444
INSR	rs2059807	4.45193	0.28	-1.58824	0.555556	0.382353	0.0810811	0.40625	-1.6129	0.97561	1.44444	-1.1875	0.325	0.790698	0.704545	-0.909091	-1.24444
ERBB4	rs2178575	1.69743	0.26361	-2.64062	0.605634	1.72727	0.944444	-2.11905	-0.585366	-2.11538	-1.30556	0.0476191	-0.830769	-0.54054	0.0273973	0	0.932432
FSHR	rs2268361	-0.517511	1.62403	-0.666667	-0.0943396	-0.82	1.07407	1.3125	1.1875	0.341463	1.53571	0.757576	0.918367	1.78182	1.73585	1.61111	1.50909
ERBB3/RAB5B	rs2271194	-2.70941	-0.408907	1.39583	-0.730769	-0.959184	-0.245283	2.42424	1.625	1.26829	2.46429	0.727273	1.32	-0.125	-2	-0.321429	-0.785714
HMGA2	rs2272046	-0.270234	1.24184	-0.131313	-1.51887	0.0294118	-1.12727	1.33333	-0.344444	1	1.20253	0.365591	-0.330508	0.1	-1.15385	-1.15385	-2.07692
FSHR	rs2349415	-1.41704	1.35115	-0.0833333	-0.973684	-1.13514	0.538462	0.485714	2.02941	-1.25	1.13333	2.42857	-0.0952381	0.133333	1.26087	-0.282609	-0.234043
DENND1A	rs2479106	-4.05262	0.426523	1.5	-0.0526316	-2.78378	0.307692	-0.212121	0.636364	0.116279	-1.21429	0	5.02326	4.34783	1.69565	2.34043	0.229167
C9orf3	rs3802457	-0.55703	-0.916772	-1.00535	-1.89573	-0.626316	-1.43925	-0.866667	-1.30769	-1.05882	-1.07692	-1.73333	-1.4335	-1.41667	-0.330435	-1.75	-0.791667
TOX3	rs4784165	1.39232	-0.767606	0.254545	0.898305	1.82143	0.229508	0.368421	-0.54054	-0.208333	0.6875	-0.486486	-1.16364	-1.57143	-0.295082	-1.58065	-0.887097
SUMO1P1	rs6022786	1.93081	1.41339	1.26531	0.481481	-0.08	0	0.484849	0.84375	0.097561	0.25	1.0303	0.142857	0.872727	1.09434	0.907407	0.690909
RAB5B/SUOX	rs705702	2.68275	0.761539	-1.44898	0.907407	0.96	0.763636	-2.82353	-1.63636	-2.32558	-2.44828	-0.470588	-1.08	-0.660714	1.10714	0.0892857	0.678571
GATA4/NEIL2	rs804279	-0.880917	-0.34965	0.62069	0.9375	-0.847458	0.348485	1.55263	0.486486	2.29167	1.59375	0.105263	-0.745455	0.190476	0.887097	-0.587302	-0.403226
TOX3	rs8043701	-0.454846	1.26316	-1.5303	-0.0694444	0.205882	0.391892	0.651163	-0.116279	0.854545	0.54054	0.0930233	-0.3125	-0.661972	0.217391	-0.478261	0.128571
DENND1A	rs9696009	-2.7682	0.675676	-0.0421053	-0.534653	-1.35417	0.326923	1.93548	1.13115	1.39241	1.33962	1.14286	2.51579	2.4	2.2	1.7	1.4
SNV: single nucleotide variant; WC: waist circumference; WHR: waist-hip ratio; BC: breast cancer; ER: estrogen receptor; T2DM: type 2 diabetes mellitus; CAD: coronary artery disease; SHBG: sex hormone binding globulin; BMI: body mass index; LH: luteinizing hormone; HOMA-IR: homeostatic model assessment of insulin resistance; FI: fasting insulin; FG: fasting glucose; HDL: high-density lipoprotein;…

## Sheet: Supplementary table 4
Supplementary table 4. The 53 instrumental variables for composed insulin resistant phenotype
SNV	Gene	CHR:BP	EA	NEA	EA frequency	β	s.e.
rs17386142	DMRTA2	1:50815783	C	T	0.92744	0.0224303	0.00400815
rs11577194	CSF1	1:110500175	T	C	0.4789	0.0135133	0.00196299
rs9425291	DNM3	1:172312769	A	G	0.4288	0.0149374	0.00199413
rs4846565	RNU5F-1 / LYPLAL1	1:219722104	G	A	0.6939	0.0162859	0.00208385
rs2249105	CEP68	2:65287896	A	G	0.6227	0.0159435	0.00201374
rs492400	USP37	2:219349752	T	C	0.6029	0.0129584	0.00203774
rs308971	SYN2 / PPARG	3:12116620	G	A	0.1385	0.0236288	0.00291537
rs3864041	COL6A4P1	3:15185634	T	C	0.6227	0.0109316	0.00212383
rs9881942	ADCY5	3:123082416	A	G	0.4354	0.012712	0.00197336
rs6822892	PDGFC	4:157734675	A	G	0.6464	0.0181506	0.00208385
rs4976033	PIK3R1	5:67714246	G	A	0.3799	0.0168678	0.00215357
rs6887914	MCC	5:112711486	C	T	0.781	0.0143503	0.00246364
rs1045241	TNFAIP8	5:118729286	C	T	0.7427	0.0136755	0.00223379
rs2434612	EBF1	5:158022041	G	A	0.2071	0.0168295	0.00248483
rs966544	CPEB4	5:173350405	G	A	0.3074	0.0139473	0.00214223
rs12525532	ANKS1A	6:35004819	T	C	0.3958	0.0148839	0.00203393
rs9492443	L3MBTL3	6:130398731	C	T	0.7639	0.0143917	0.00223379
rs17169104	MEOX2	7:15883727	G	C	0.3417	0.0183302	0.00250369
rs4738141	EYA1	8:72469742	G	A	0.2493	0.0173766	0.00249145
rs498313	MIR548H3	9:78034169	A	G	0.6913	0.0122984	0.00212383
rs11231693	MACROD1	11:63862612	A	G	0.06069	0.0315533	0.00423559
rs17402950	ATF7IP	12:14571671	G	A	0.05541	0.0311579	0.00580273
rs718314	ITPR2	12:26453283	G	A	0.2348	0.0160844	0.00226414
rs7323406	ANKRD10	13:111628195	A	G	0.2784	0.0150323	0.00303812
rs7176058	C15orf54	15:39464167	A	G	0.8364	0.0148738	0.00263426
rs8032586	LOC100287559	15:73081067	C	T	0.8813	0.0212975	0.0042999
rs754814	ZMYND15	17:4657034	T	C	0.7309	0.0117416	0.00219418
rs6066149	EYA2	20:45602638	G	A	0.7612	0.0138085	0.00226414
rs683135	MACF1	1:39895460	A	G	0.2678	0.0190829	0.00216275
rs10195252	COBLL1 / GRB14	2:165513091	T	C	0.5818	0.0271843	0.00205301
rs2943645	IRS1	2:227099180	T	C	0.6227	0.030591	0.00201374
rs295449	KLHL18	3:47375955	A	G	0.595	0.0144348	0.00230587
rs11130329	TMEM110-MUSTN1	3:52896855	A	C	0.8641	0.0228473	0.00400104
rs645040	MSL2	3:135926622	T	G	0.7691	0.0250453	0.00239352
rs2699429	DOK7	4:3480136	C	T	0.4063	0.0164798	0.00208385
rs3822072	FAM13A	4:89741269	A	G	0.4881	0.02126	0.00199413
rs4865796	ARL15 / FST	5:53272664	A	G	0.7071	0.0158457	0.00212383
rs459193	ANKRD55	5:55806751	G	A	0.715	0.0221831	0.00223379
rs6937438	LOC100132354	6:43815364	A	G	0.7084	0.0149774	0.00219418
rs2745353	RSPO3	6:127452935	T	C	0.4789	0.0183932	0.00197336
rs3861397	LOC645434	6:139828916	G	A	0.3417	0.0205698	0.00205301
rs972283	KLF14	7:130466854	G	A	0.5435	0.0228455	0.00212971
rs2126259	PPP1R3B	8:9185146	T	C	0.09103	0.0442512	0.00315658
rs1011685	LPL	8:19830769	C	T	0.8773	0.116163	0.00326565
rs7005992	TRIB1	8:126528955	C	G	0.1359	0.0179112	0.00286476
rs10995441	NRBF2	10:64869239	G	T	0.2361	0.0162727	0.00239498
rs7973683	CCDC92 / DNAH10	12:124449223	C	A	0.6385	0.0241561	0.00205301
rs7227237	LIPG	18:47174679	C	T	0.7678	0.0178001	0.00321892
rs8101064	INSR	19:7293119	T	C	0.04354	0.0565322	0.00816483
rs4804833	MAP2K7	19:7970635	A	G	0.4103	0.0177295	0.00212833
rs4804311	MYO1F	19:8615589	A	G	0.8905	0.0367298	0.00358621
rs731839	PEPD	19:33899065	G	A	0.3417	0.0233359	0.0020912
rs132985	PLA2G6	22:38563471	C	T	0.5646	0.0175995	0.00194317
SNV: single nucleotide variant; EA: effect allele. NEA: non-effect allele; s.e.: standard error.
